# Supplementary material for: Revisiting a Remedy Against Chains of Unkindness
Source: Springer Nature journal article supplement (doi:10.1007/s41464-020-00090-2), 2020-05-12
Supplement: MOESM1 [file 17977010]

# INSTRUCTIONS

Welcome to this experiment. These instructions are the same for all participants and provide you with all relevant information regarding your participation in this experiment. If you have any questions, please raise your hand. The experimenter will then come to answer your question. During the whole experiment, we ask you to remain silent and not to talk to other participants.

During the experiment you can earn money. Amounts will directly be displayed in Euro. After the experiment you will receive the money you earned in your experimental account, additional to a fix show-up fee of 2.50€, in cash.

## Happiness Ratings

During the experiment you will repeatedly be asked to rate your mood by selecting a suitably symbol. Please, indicate how you feel in that very moment, by choosing one out of the nine symbols displayed below. Symbols on the extreme right or left represent rather extreme moods, while the ones towards the center represent more ambiguous moods. **There are no right or wrong answers. Please be honest and answer only according to your mood at that very moment.** Your mood ratings will not affect your payment in any way.

Please, do carefully study the adjectives describing the moods at the extreme left and right. Please, try to remember the adjectives corresponding to these symbols, as during the experiment only the symbols will be displayed. Hence, you can only study the symbols together with the adjectives on this sheet of instructions.

|              |                                                                                    |                                                                                    |                                                                                    |                                                                                    |                                                                                    |                                                                                    |                                                                                     |                                                                                      |                                                                                      |            |
|--------------|------------------------------------------------------------------------------------|------------------------------------------------------------------------------------|------------------------------------------------------------------------------------|------------------------------------------------------------------------------------|------------------------------------------------------------------------------------|------------------------------------------------------------------------------------|-------------------------------------------------------------------------------------|--------------------------------------------------------------------------------------|--------------------------------------------------------------------------------------|------------|
| dissatisfied | 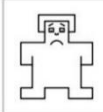 |  |  |  |  |  |  |  |  | satisfied  |
| unhappy      |                                                                                    |                                                                                    |                                                                                    |                                                                                    |                                                                                    |                                                                                    |                                                                                     |                                                                                      |                                                                                      | happy      |
| annoyed      |                                                                                    |                                                                                    |                                                                                    |                                                                                    |                                                                                    |                                                                                    |                                                                                     |                                                                                      |                                                                                      | joyful     |
| desperate    |                                                                                    |                                                                                    |                                                                                    |                                                                                    |                                                                                    |                                                                                    |                                                                                     |                                                                                      |                                                                                      | hopeful    |
| melancholic  |                                                                                    |                                                                                    |                                                                                    |                                                                                    |                                                                                    |                                                                                    |                                                                                     |                                                                                      |                                                                                      | harmonious |

## Sequence in the Experiment

In this experiment there are three roles: Boss, Rater and Encrypter. At the beginning of the experiment, one participant will be randomly chosen for the role of Boss. Initially, all other participants are assigned the role of Rater. They will be split into pairs of two, and these pairs remain intact until the end of the experiment. For these participants, the experiment consist of three parts: working, sharing, and guessing.

The Boss receives a fix payment, conditional on fulfilling the following requirements without restrictions:

- The Boss converts one participant of each pair into an Encrypter.
- He decides in favor of the Encrypters being pressed to hurry.
- By clicking on a button, he confirms his support of Encrypters being interrupted by reminders to hurry up. With each interruption, all Encrypters are reminded to hurry up and their current entry will be deleted.

## Part I: Working

| Rater                                                                                                                                                                                                                                                                                                                                                      | Encrypter                                                                                                                                                                                                                                                                                                                                                                                                                                                                |
|------------------------------------------------------------------------------------------------------------------------------------------------------------------------------------------------------------------------------------------------------------------------------------------------------------------------------------------------------------|--------------------------------------------------------------------------------------------------------------------------------------------------------------------------------------------------------------------------------------------------------------------------------------------------------------------------------------------------------------------------------------------------------------------------------------------------------------------------|
| Your task is enjoyable. You will watch short, funny videos, and have the possibility to rate them according to their value of entertainment.<br>To do so, one video after the other will be shown to you, and you will be able to rate a video by ticking „I like!“. Until the Encrypters complete their task, you will always be shown yet another video. | You will be shown the numbers 1 to 26 and one letter of the alphabet corresponding to each number. Below, you will see a combination of numbers, that you will have to translate into the corresponding letters. Enter the resulting combination of letters to get to the next task.<br>For leaving the annoying work phase, each Encrypter has to solve a minimum number of tasks. This number is a randomly determined number between 3 and 10 and will remain secret. |
|                                                                                                                                                                                                                                                                                                                                                            | As long as any Encrypter is still working on his minimum of tasks, you will always receive yet another task yourself. In case that all participants end up waiting for a few Encrypters to finish, Part I will automatically stop after a fixed amount of time.                                                                                                                                                                                                          |
| <b>Total payment for part I: 0.10€</b>                                                                                                                                                                                                                                                                                                                     | <b>Total payment for part I: 0.10€</b>                                                                                                                                                                                                                                                                                                                                                                                                                                   |

As a Rater, do not forget to put on your headphones as soon as you can see the first video.

## Part II: Sharing

The Boss does not participate in part II. As an Encrypter or Rater, you will be asked to split up an amount of money between yourself and another person. This amount of money is of the same height for all participants. Please note: This other person is not your partner, but instead a different participant of a future experiment. This future experiment will be taking place in the BaER-Lab during the summer term of 2017.

## Part III: Guessing

The Boss does not participate in part III. As an Encrypter or Rater you are asked to guess the mood that the participant who is paired to you has indicated right after finishing part I (working). If your guess is correct, you will receive 0.40€.

## Payment

The final payment that you will receive for participating in the present experiment will be composed as follows:

| Rater                                                                                                                                                                                                                                                            | Encrypter                                                                                                                                                                                                                                                        |
|------------------------------------------------------------------------------------------------------------------------------------------------------------------------------------------------------------------------------------------------------------------|------------------------------------------------------------------------------------------------------------------------------------------------------------------------------------------------------------------------------------------------------------------|
| <b>From part I:</b> 0.10€<br><b>From part II:</b> the amount of money that you assigned to yourself when splitting up the money between yourself and the future participant of a different experiment<br><b>From part III:</b> 0.40€, in case of a correct guess | <b>From part I:</b> 0.10€<br><b>From part II:</b> the amount of money that you assigned to yourself when splitting up the money between yourself and the future participant of a different experiment<br><b>From part III:</b> 0.40€, in case of a correct guess |
| Additionally, all participants receive a fixed show-up fee of 2.50€.                                                                                                                                                                                             |                                                                                                                                                                                                                                                                  |

The Boss will receive the fix payment without any reductions, given that he fulfills the requirements as specified above without any restrictions. The height of the fix payment will be revealed to him right at the beginning of the experiment, before any decision needs to be taken. In case that the Boss decides against fulfilling the requirements as specified above, reductions from his fix payment will be made. In that case, the Boss can only rely on the fix show-up fee of 2.50€ that, just as for all other participants, he will receive unconditionally.

## After the Experiment

After the experiment you will be asked to answer a post-experimental questionnaire. Please, do give honest and complete answers to all questions. Your answers are anonymous and will not affect your payment in any way.

### Important remarks:

- Throughout the experiment you may not communicate with other participants.
- Cellphones must be turned off during the experiment.
- In case of any questions, please raise your hand and remain seated. Please ask your question in a way that does not allow other participants to overhear them.
- All of your decisions are anonymous. Consequently, none of the other participants will learn the identity of anyone who made a particular decision during the experiment.
- Payment is anonymous, hence, the participants will not observe the payment of any other participant.
- Please, remain seated until the end of the experiment. You will be called by your seat number to receive your payment.

**Lots of success and thank you for your participation!**
