# Supplementary material for: Revisiting a Remedy Against Chains of Unkindness
Source: Springer Nature journal article supplement (doi:10.1007/s41464-020-00090-2), 2020-05-12
Supplement: MOESM2 [file 17977010]

# ANLEITUNG

Sie nehmen nun an einem wissenschaftlichen Experiment teil. Diese Anleitung ist für alle Teilnehmer gleich und erklärt Ihnen alles, was Sie für die Teilnahme wissen müssen. Falls Sie Fragen haben, melden Sie sich bitte per Handzeichen, ansonsten gilt während des gesamten Experiments ein absolutes Kommunikationsverbot.

Im Laufe des Experiments können Sie Geld verdienen. Alle Beträge werden direkt in Euro angegeben. Am Ende des Experiments wird Ihnen Ihr Guthaben zusätzlich zum Teilnahmeentgelt von 2,50€ in bar ausgezahlt.

## Stimmungsabfragen

Während des Experiments werden Sie mehrmals gebeten, Ihre Stimmungslage durch die Auswahl von Symbolen auszudrücken. Bitte geben Sie an, wie Sie sich im entsprechenden Moment fühlen, indem Sie eines der neun Symbole auswählen. Dabei stehen die äußeren Symbole für extreme und die mittigeren Symbole für entsprechend weniger eindeutige Stimmungslagen. **Es gibt keine richtigen oder falschen Antworten. Antworten Sie bitte ehrlich und nur Ihrer aktuellen Stimmungslage entsprechend.** Die Stimmungsabfragen haben keinerlei Auswirkung auf Ihre Auszahlungen.

Bitte lesen Sie sich die Adjektive zu den Extremen genau durch. Versuchen Sie sich die Adjektive in Verbindung mit den Symbolen zu merken, da Ihnen während des Experiments nur die Symbole angezeigt werden. Sie sehen also nur auf diesem Blatt die Symbole in Kombination mit den Adjektiven.

|                                                                     |                                                                                     |                                                                    |
|---------------------------------------------------------------------|-------------------------------------------------------------------------------------|--------------------------------------------------------------------|
| unzufrieden<br>unglücklich<br>genervt<br>verzweifelt<br>schwermütig | 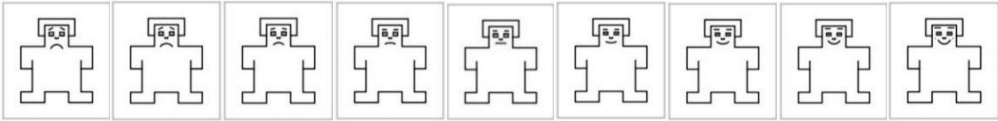 | zufrieden<br>glücklich<br>erfreut<br>hoffnungsvoll<br>ausgeglichen |
|---------------------------------------------------------------------|-------------------------------------------------------------------------------------|--------------------------------------------------------------------|

## Ablauf des Experiments

In diesem Experiment gibt es drei Rollen: Boss, Bewerter und Übersetzer. Zu Beginn des Experiments wird zufällig ein Teilnehmer aus dem Raum ausgelost, der als einziger die Rolle des Bosses übernimmt. Alle anderen Teilnehmer werden in Paare aufgeteilt, die einander für den Rest des Experiments zugeordnet bleiben. Sie alle sind zunächst Bewerter, und das Experiment besteht für sie aus drei Teilen: Arbeiten, Aufteilen und Einschätzen.

Der Boss erhält ein Fixgehalt, aber nur wenn er die folgenden Bedingungen voll erfüllt:

- Der Boss macht einen der Teilnehmer aus jedem Paar zu einem Übersetzer.
- Er entscheidet sich dafür, dass die Übersetzer zur Eile angetrieben werden.
- Er drückt durch Bestätigen per Klick jedes Mal seine Unterstützung für eine Unterbrechung aus. Bei jeder Unterbrechung werden alle Übersetzer daran erinnert sich zu beeilen und ihre aktuelle Eingabe wird gelöscht.

## Teil 1: Arbeiten

| Bewerter                                                                                                                                                                                                                                                                                                                                                 | Übersetzer                                                                                                                                                                                                                                                                                                                                                                                                                                                                                                                                                                                                                                                                                                                                   |
|----------------------------------------------------------------------------------------------------------------------------------------------------------------------------------------------------------------------------------------------------------------------------------------------------------------------------------------------------------|----------------------------------------------------------------------------------------------------------------------------------------------------------------------------------------------------------------------------------------------------------------------------------------------------------------------------------------------------------------------------------------------------------------------------------------------------------------------------------------------------------------------------------------------------------------------------------------------------------------------------------------------------------------------------------------------------------------------------------------------|
| Ihre Aufgabe ist angenehm. Sie können lustige, unterhaltsame Filme anschauen und je nach Unterhaltungswert bewerten.<br><br>Sie bekommen dazu ein Video nach dem anderen angezeigt, und die Möglichkeit jedes Video durch einen Haken bei „Gefällt mir!“ zu bewerten. Es werden so lange neue Videos angezeigt, bis die Übersetzer Teil 1 beendet haben. | Ihnen werden die Zahlen 1 bis 26 und je ein zugeordneter Buchstabe angezeigt. Darunter sehen Sie eine Kombination von Zahlen, die Sie in Buchstaben übersetzen sollen. Geben Sie die entstehende Kombination von Buchstaben ein, um zur nächsten Übersetzungsaufgabe zu gelangen.<br><br>Um die unangenehme Arbeitsphase zu verlassen, muss jeder Übersetzer eine Mindestzahl an Aufgaben richtig lösen. Diese Zahl liegt zwischen 3 und 10 und wird den Übersetzern zugelost, aber nicht mitgeteilt.<br><br>Sie bekommen so lange neue Aufgaben angezeigt, bis alle Übersetzer ihre Mindestzahl an Aufgaben gelöst haben. In dem Ausnahmefall, dass alle Teilnehmer nur noch auf einzelne Übersetzer warten, wird Teil 1 vorzeitig beendet. |
| <b>Gesamtauszahlung für Teil 1: 0,10€</b>                                                                                                                                                                                                                                                                                                                | <b>Gesamtauszahlung für Teil 1: 0,10€</b>                                                                                                                                                                                                                                                                                                                                                                                                                                                                                                                                                                                                                                                                                                    |

Als **Bewerter** denken Sie bitte daran, dass Sie Ihre Kopfhörer aufzusetzen sobald das erste Video erscheint.

## Teil 2: Aufteilen

**Der Boss** nimmt nicht an Teil 2 teil. Als **Übersetzer** und als **Bewerter**, werden Sie gebeten jeweils einen Geldbetrag zwischen sich und einer anderen Person aufzuteilen. Der Geldbetrag ist für alle Teilnehmer gleich hoch. Wichtig: Diese andere Person ist nicht Ihr Partner, sondern ein Teilnehmer eines anderen Experiments. Dieses andere Experiment wird im Sommersemester 2017 im BaER-Lab stattfinden.

## Teil 3: Einschätzen

**Der Boss** nimmt nicht an Teil 3 teil. Als **Übersetzer** und als **Bewerter** sollen Sie die Stimmung einschätzen, die der Ihnen zugewiesene Partner unmittelbar nach Teil 1 (Arbeiten) angegeben hat. Liegen Sie mit Ihrer Einschätzung richtig, erhalten Sie 0,40€.

## Auszahlung

Die Auszahlungen für dieses Experiment setzen sich wie folgt zusammen:

| Bewerter                                                                                                                                                                           | Übersetzer                                                                                                                                                                         |
|------------------------------------------------------------------------------------------------------------------------------------------------------------------------------------|------------------------------------------------------------------------------------------------------------------------------------------------------------------------------------|
| <b>Aus Teil 1:</b> 0,10€<br><b>Aus Teil 2:</b> der Betrag, den Sie bei der Aufteilung sich selbst zugeteilt haben<br><b>Aus Teil 3:</b> 0,40€, falls Ihre Einschätzung richtig war | <b>Aus Teil 1:</b> 0,10€<br><b>Aus Teil 2:</b> der Betrag, den Sie bei der Aufteilung sich selbst zugeteilt haben<br><b>Aus Teil 3:</b> 0,40€, falls Ihre Einschätzung richtig war |
| Zusätzlich erhalten alle Teilnehmer das feste Teilnahmeentgelt von 2,50€.                                                                                                          |                                                                                                                                                                                    |

**Der Boss** erhält das volle Fixgehalt ohne Abzüge, gegeben dass er die oben genannten Bedingungen ohne Einschränkungen erfüllt. Die Höhe des Fixgehalts erfährt er direkt zu Beginn des Experiments. Falls der Boss sich dagegen entscheidet, die oben genannten Bedingungen zu erfüllen, wird sein Fixgehalt gekürzt. Dann ist dem Boss nur das feste Teilnahmeentgelt von 2,50€ sicher, welches er wie alle anderen Teilnehmer in jedem Fall erhält.

## Nach dem Experiment

Im Anschluss an das Experiment werden Sie gebeten, noch einige Fragen zu beantworten. Bitte beantworten Sie alle Fragen ehrlich und vollständig. Ihre Antworten sind anonym und haben keinen Einfluss auf Ihre Auszahlung in diesem Experiment.

### Bitte beachten Sie:

- Während des gesamten Experiments ist keine Kommunikation mit anderen Teilnehmern gestattet.
- Alle Handys müssen während der kompletten Experimentdauer ausgeschaltet sein.
- Wenn Sie eine Frage haben, bleiben Sie bitte an Ihrem Platz sitzen und heben die Hand. Stellen Sie bitte Ihre Frage so, dass kein anderer Teilnehmer Ihre Frage mithören kann.
- Sämtliche Entscheidungen erfolgen anonym, d.h. keiner der anderen Teilnehmer erfährt die Identität desjenigen, der eine bestimmte Entscheidung getroffen hat.
- Auch die Auszahlung erfolgt anonym, d.h. kein Teilnehmer erfährt, wie hoch die Auszahlung eines anderen Teilnehmers ist.
- Bitte bleiben Sie bis zum Ende des Experiments an Ihrem Platz sitzen, Sie werden zur Auszahlung mittels der Ihnen zugeordneten Platznummer aufgerufen.

**Viel Erfolg und Danke für Ihre Teilnahme an diesem Experiment!**
